# Supplementary material for: Air pollution measurement errors: Is your data fit for purpose?
Source: Copernicus journal article supplement (doi:10.5194/amt-2022-58), 2022-02-22
Supplement: Supplementary file 1 [file amt-2022-58-supplement-version3.pdf]

1 **Table S1. Research grade instrumentation used for this study.**

| Analyte                 | Manchester                     |                                         |                                         | York                                       |
|-------------------------|--------------------------------|-----------------------------------------|-----------------------------------------|--------------------------------------------|
| <b>NO<sub>2</sub></b>   | *Teledyne T500U<br>(CAPS)      | **Teledyne T200U<br>(Chemiluminescence) | **Teledyne T200U<br>(Chemiluminescence) | -----                                      |
| <b>O<sub>3</sub></b>    | *Thermo 49i<br>(UV photometry) | **Thermo 49i<br>(UV photometry)         | **2B<br>(UV photometry)                 | -----                                      |
| <b>PM<sub>2.5</sub></b> | -----                          | -----                                   | -----                                   | *Met One BAM<br>1020<br>(Beta attenuation) |

2 \*Instruments permanently deployed at the site.

3 \*\*Instruments temporarily deployed as part of the QUANT study.

4

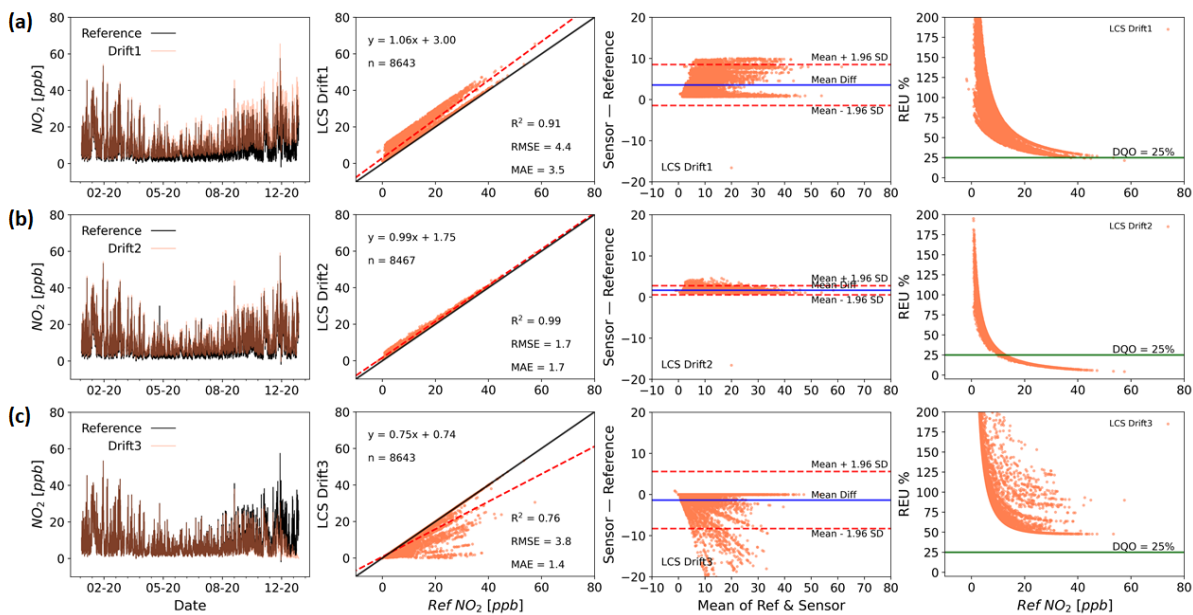

5

6 **Figure S1. Time series (left panels), regression plots (middle-left panels), Bland-Altman plots (middle-right panels) and**  
 7 **REU (right panels, DQO for NO<sub>2</sub> = 25%) for baseline drift (a-panels), temperature interference drift (b-panels), and**  
 8 **instrument sensitivity drift (c-panels) simulated errors.**

9

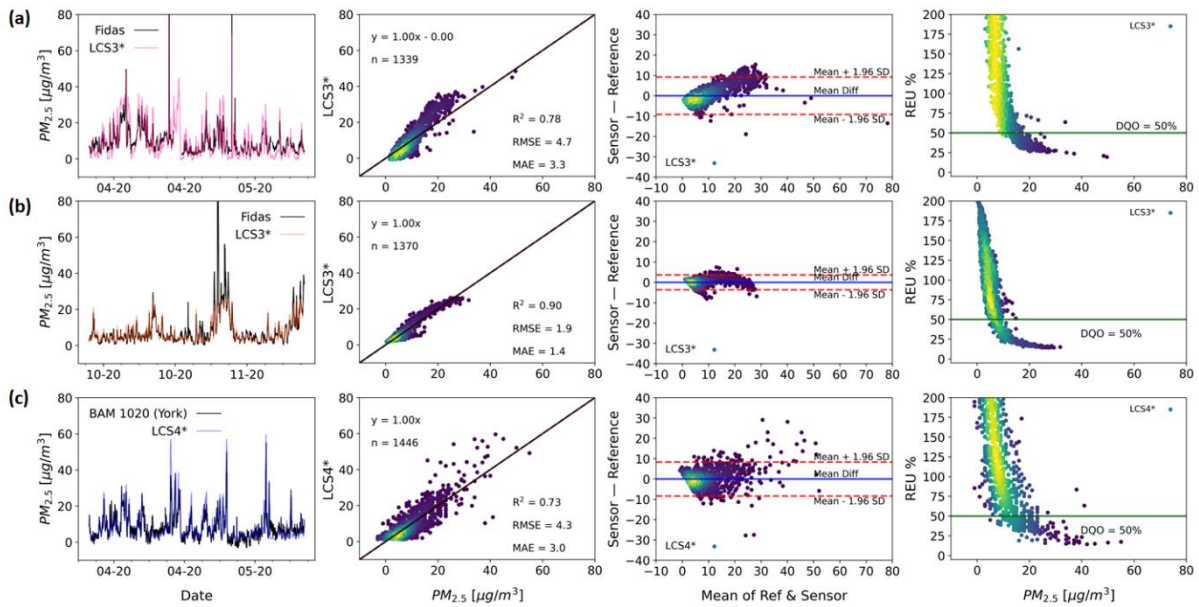

10  
 11 **Figure S2.** Two bias corrected LCS systems (LCS3 & LCS4, same brand) measuring PM<sub>2.5</sub> (Time res 1 h). While LCS3  
 12 is shown for the same location (Manchester) but unfolded in two different seasons (a-panels: Apr to May 2020; b-  
 13 panels: Oct to Nov 2020), LCS4 is at a different location (c-panels: York, Apr to May 2020). Time series (left panels),  
 14 regression plots (middle-left panels), Bland-Altman plots (middle-right panels) and REU (right panels; DQO<sub>PM<sub>2.5</sub></sub> =  
 15 50%) are used to characterise the device's error structure. All but the time-series plots have been coloured by data  
 16 density.

17

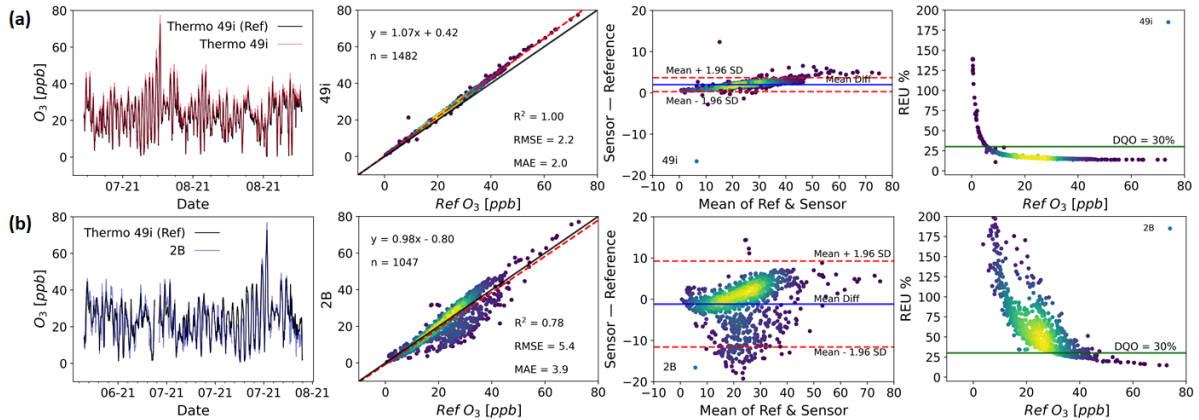

18  
 19 **Figure S3.** Time series (left panels), regression plots (middle-left panels), Bland-Altman plots (middle-right panels) and  
 20 REU (right panels, DQO for O<sub>3</sub> = 30%) for two ozone research grade instruments (1hr time res): a Thermo 49i (a-  
 21 panels, July & August 2021) and a 2B (b-panels, June and July 2021). All but the time-series plots have been  
 22 coloured by data density.
