# Supplementary material for: Air pollution measurement errors: Is your data fit for purpose?
Source: Copernicus journal article supplement (doi:10.5194/amt-2022-58), 2022-02-22
Supplement: Supplementary file 2 [file amt-2022-58-supplement.pdf]

1 **Table S1. Research grade instrumentation used for this study.**

| Analyte                 | Manchester                     |                                         |                                         | York                                       |
|-------------------------|--------------------------------|-----------------------------------------|-----------------------------------------|--------------------------------------------|
| <b>NO<sub>2</sub></b>   | *Teledyne T500U<br>(CAPS)      | **Teledyne T200U<br>(Chemiluminescence) | **Teledyne T200U<br>(Chemiluminescence) | -----                                      |
| <b>O<sub>3</sub></b>    | *Thermo 49i<br>(UV photometry) | **Thermo 49i<br>(UV photometry)         | **2B<br>(UV photometry)                 | -----                                      |
| <b>PM<sub>2.5</sub></b> | -----                          | -----                                   | -----                                   | *Met One BAM<br>1020<br>(Beta attenuation) |

2 \*Instruments permanently deployed at the site.

3 \*\*Instruments temporarily deployed as part of the QUANT study.

4

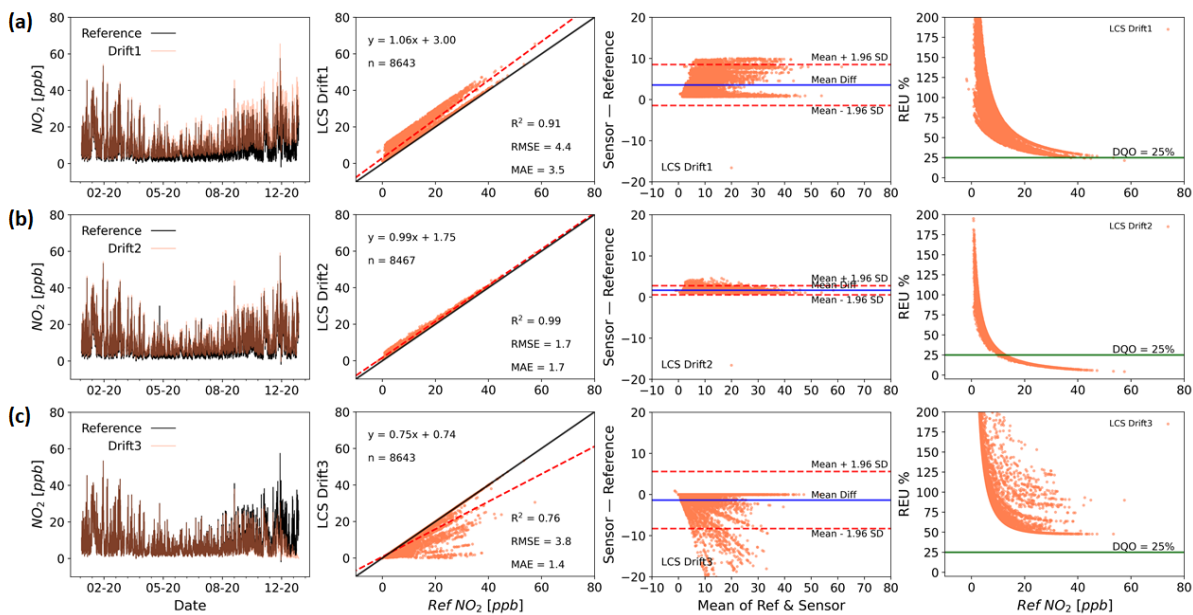

5

6 **Figure S1. Time series (left panels), regression plots (middle-left panels), Bland-Altman plots (middle-right panels)**

7 **and REU (right panels, DQO for NO<sub>2</sub> = 25%) for baseline drift (a-panels), temperature interference drift (b-panels),**

8 **and instrument sensitivity drift (c-panels) simulated errors.**

9

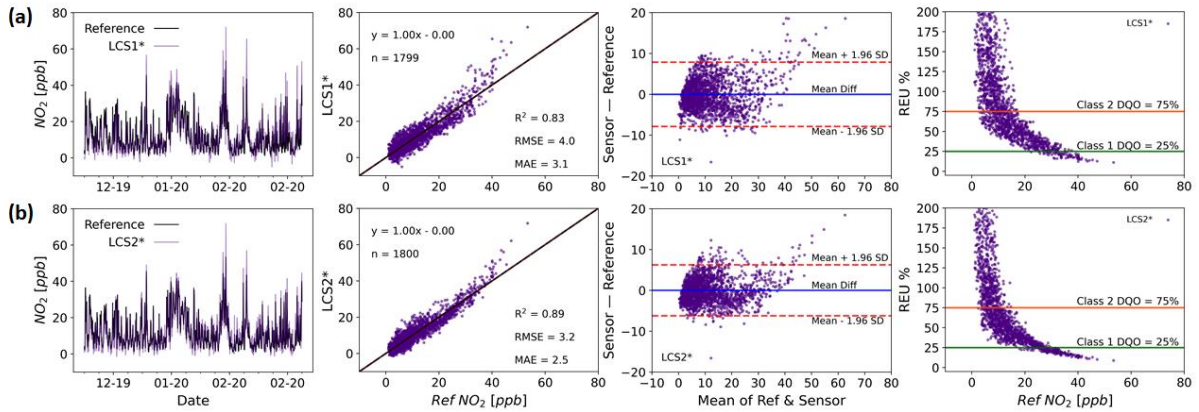

10  
 11 **Figure S2.** Time series (left panels), regression plots (middle-left panels), Bland-Altman plots (middle-right panels)  
 12 and REU (right panels; NO<sub>2</sub> Class 1 DQO = 25% & Class 2 DQO = 75%) for NO<sub>2</sub> measurements by two LCS bias-  
 13 corrected systems of different brands (panels a and b) in the same location (Manchester Supersite, December 2019 to  
 14 February 2020, 1hr time res).

15

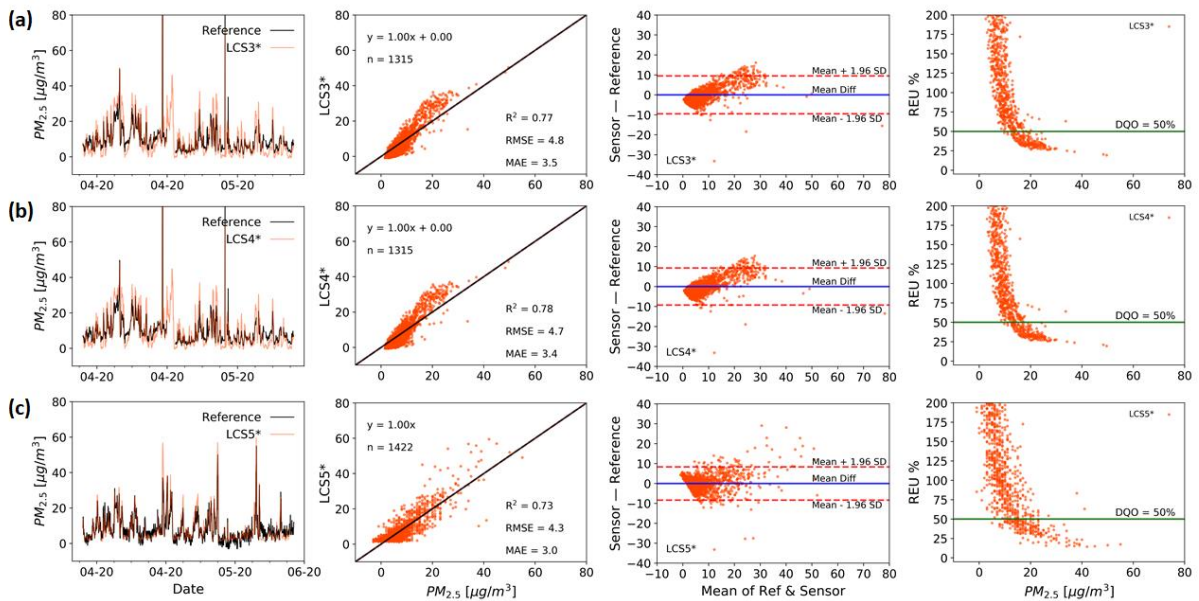

16  
 17 **Figure S3.** Time series (left panels), regression plots (middle-left panels), Bland-Altman plots (middle-right panels)  
 18 and REU (right panels, DQO for PM<sub>2.5</sub> = 50%) for PM<sub>2.5</sub> measurements by three LCS bias-corrected systems of the  
 19 same brand (panels a, b and c) in different locations (April & May 2020, 1hr time res): an urban background  
 20 (Manchester Supersite, a and b panels) and a roadside site (York, c panels).

21

22

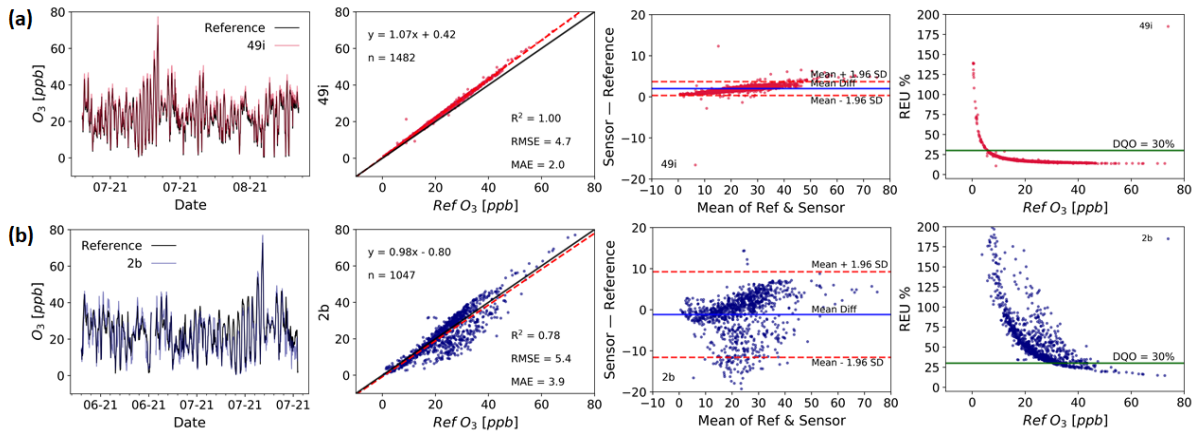

23

24

25

26

**Figure S4. Time series (left panels), regression plots (middle-left panels), Bland-Altman plots (middle-right panels) and REU (right panels, DQO for O<sub>3</sub> = 30%) for two ozone research grade instruments (1hr time res): a Thermo 49i (a- panels, July & August 2021) and a 2B (b-panels, June and July 2021).**
